# Supplementary material for: T-Cell Receptor Rearrangements Determined Using Fragment Analysis in Patients With T-Acute Lymphoblastic Leukemia
Source: PubMed Central journal article supplement — Ann Lab Med. 2018 Nov 13;39(2):125–32. doi: 10.3343/alm.2019.39.2.125 (PMC6240512; doi:10.3343/alm.2019.39.2.125), 2018-11-13
Supplement: alm-39-125-s001.pdf [file alm-39-125-s001.pdf]

**Supplemental Data Table S1.** Baseline characteristics of T-ALL patients according to three age groups

|                                 | Total<br>(N = 51) | Children<br>(< 12 yr; N = 16) | Adolescents<br>(12–18 yr; N = 9) | Adults<br>(> 18 yr; N = 26) | <i>P</i> * |
|---------------------------------|-------------------|-------------------------------|----------------------------------|-----------------------------|------------|
| Sex                             |                   |                               |                                  |                             | 0.700      |
| Male, N (%)                     | 33 (64.7)         | 11 (33.3)                     | 6 (18.2)                         | 16 (48.5)                   |            |
| Female, N (%)                   | 18 (35.3)         | 5 (27.8)                      | 3 (16.7)                         | 10 (55.5)                   |            |
| Age (yr), median (IQR)          | 18.0 (9.2–33.1)   | 6.2 (3.0–9.2)                 | 15.1 (13.6–16.4)                 | 33.0 (19.0–47.0)            |            |
| TCR clonality                   |                   |                               |                                  |                             | 0.076      |
| No clonality, N (%)             | 13 (25.5)         | 1 (7.7)                       | 4 (30.8)                         | 8 (61.5)                    |            |
| Clonality, N (%)                | 38 (74.5)         | 15 (39.5)                     | 5 (13.2)                         | 18 (47.3)                   |            |
| Immunophenotype                 |                   |                               |                                  |                             | 0.408      |
| Pro-/Pre-T, N (%)               | 19 (37.3)         | 3 (15.8)                      | 3 (15.8)                         | 13 (68.4)                   |            |
| Cortical/ Medullary T, N (%)    | 32 (62.7)         | 13 (40.6)                     | 6 (18.8)                         | 13 (40.6)                   |            |
| BM blasts (%), median (IQR)     | 83.1 (61.0–93.0)  | 83.1 (76.3–98.6)              | 81.9 (63.0–97.5)                 | 72.0 (50.0–93.0)            | 0.712      |
| CR after induction CTx, N (%)   | 39 (76.5)         | 14 (35.9)                     | 8 (20.5)                         | 17 (43.6)                   | 0.050      |
| Death within two years, N (%)   | 20 (39.2)         | 3 (15.0)                      | 2 (10.0)                         | 15 (75.0)                   | 0.314      |
| Relapse within two years, N (%) | 15 (29.4)         | 2 (12.5)                      | 1 (11.1)                         | 13 (50.0)                   | 0.412      |

\*Calculated using Student's t-test, Pearson's chi-squared test, a one-way ANOVA, or a Mann-Whitney U test.

Abbreviations: T-ALL, T-acute lymphoblastic leukemia; IQR, interquartile range; TCR, T-cell receptor; Pro-T, prothymocytic; Pre-T, prethymocytic; CR, complete remission; CTx, chemotherapy; BM, bone marrow.
