# Supplementary material for: T-Cell Receptor Rearrangements Determined Using Fragment Analysis in Patients With T-Acute Lymphoblastic Leukemia
Source: PubMed Central journal article supplement — Ann Lab Med. 2018 Nov 13;39(2):125–32. doi: 10.3343/alm.2019.39.2.125 (PMC6240512; doi:10.3343/alm.2019.39.2.125), 2018-11-13
Supplement: alm-39-125-s002.pdf [file alm-39-125-s002.pdf]

**Supplemental Data Table S2.** Frequency of *TCR* clonality detected using fragment analysis at initial diagnosis according to three age groups of T-ALL patients

|                               | Total<br>(N=51) | Children<br>(< 12 yr; N=16) | Adolescents<br>(12–18 yr; N=9) | Adults<br>(> 18 yr; N=26) |
|-------------------------------|-----------------|-----------------------------|--------------------------------|---------------------------|
| None, N (%)                   | 13 (25.5)       | 1 (7.7)                     | 4 (30.8)                       | 8 (61.5)                  |
| <i>TCRβ</i> , N (%)           | 2 (3.9)         | 1 (50.0)                    |                                | 1 (50.0)                  |
| <i>TCRγ</i> , N (%)           | 11 (21.6)       | 5 (45.5)                    |                                | 6 (54.5)                  |
| <i>TCRδ</i> , N (%)           | 5 (9.8)         | 2 (40.0)                    |                                | 3 (60.0)                  |
| <i>TCRβ+TCRγ</i> , N (%)      | 11 (21.6)       | 6 (54.5)                    | 3 (27.3)                       | 2 (18.2)                  |
| <i>TCRβ+TCRδ</i> , N (%)      | 0 (0.0)         |                             |                                |                           |
| <i>TCRγ+TCRδ</i> , N (%)      | 4 (7.8)         |                             |                                | 4 (100)                   |
| <i>TCRβ+TCRγ+TCRδ</i> , N (%) | 5 (9.8)         | 1 (20.0)                    | 2 (40.0)                       | 2 (40.0)                  |
| At least one <i>TCR</i>       | 38 (74.5)       | 15 (93.8)                   | 5 (55.6)                       | 18 (69.2)                 |

Abbreviations: *TCR*, T-cell receptor; T-ALL, T-acute lymphoblastic leukemia.
