# Supplementary material for: T-Cell Receptor Rearrangements Determined Using Fragment Analysis in Patients With T-Acute Lymphoblastic Leukemia
Source: PubMed Central journal article supplement — Ann Lab Med. 2018 Nov 13;39(2):125–32. doi: 10.3343/alm.2019.39.2.125 (PMC6240512; doi:10.3343/alm.2019.39.2.125), 2018-11-13
Supplement: alm-39-125-s003.pdf [file alm-39-125-s003.pdf]

**Supplemental Data Table S3.** Characteristics of T-ALL patients with morphological remission according to age groups at the end of induction chemotherapy

|                             | Total<br>(N=30)* | Children<br>(< 12 yr; N=13) | Adolescents<br>(12–18 yr; N=5) | Adults<br>(> 18 yr; N=12) | <i>P</i> <sup>†</sup> |
|-----------------------------|------------------|-----------------------------|--------------------------------|---------------------------|-----------------------|
| Age (yr), median (IQR)      | 15.1 (5.7–22.5)  | 5.1 (2.6–9.8)               | 14.9 (13.8–15.4)               | 28.5 (20.0–48.5)          |                       |
| <i>TCR</i> clonality        |                  |                             |                                |                           | 0.357                 |
| No clonality, N (%)         | 19 (63.3)        | 9 (47.4)                    | 1 (2.4)                        | 9 (47.4)                  |                       |
| Clonality, N (%)            | 11 (36.7)        | 4 (36.4)                    | 4 (36.4)                       | 3 (27.2)                  |                       |
| BM blasts (%), median (IQR) | 0.4 (0.2–0.6)    | 0.5 (0.2–0.5)               | 0.4 (0.2–0.7)                  | 0.2 (0.2–1.0)             | 0.475                 |
| Death within two years      | 11 (35.5)        | 1 (9.1)                     | 2 (18.2)                       | 8 (72.7)                  | 0.028                 |
| Relapse within two years    | 6 (19.4)         | 3 (50.0)                    | 1 (16.7)                       | 2 (33.3)                  | 0.271                 |

\*Among the 34 patients who were tested with fragment analysis at the end of induction chemotherapy, four persistently leukemic patients were excluded;

<sup>†</sup>Calculated using Student's t-test, Pearson's chi-squared test, a one-way ANOVA, or a Mann-Whitney U test.

Abbreviations: T-ALL, T-acute lymphoblastic leukemia; *TCR*, T-cell receptor; IQR, interquartile range; BM, bone marrow.
